# Supplementary material for: Cardiac effects of seasonal ambient particulate matter and ozone co-exposure in rats
Source: PubMed Central journal article supplement (PMC4419498; doi:10.1186/s12989-015-0087-3), 2015-05-06
Supplement: 12989_2015_87_MOESM1_ESM.pdf [file 12989_2015_87_MOESM1_ESM.pdf]

Farraj et al Additional File 1:

Table A1: Average source contributions for summer and winter exposures in  $\mu\text{g}/\text{m}^3$ . Percent of mass in parenthesis.

| Source             | Summer Exposures |                     | Winter Exposures |                     |
|--------------------|------------------|---------------------|------------------|---------------------|
|                    | CAPS             | CAPS+O <sub>3</sub> | CAPS             | CAPS+O <sub>3</sub> |
| Mobile Sources     | 23.89 (14.2)     | 24.47 (14.4)        | 14.28 (15.9)     | 13.36 (17.0)        |
| Brake Wear         | 0.66 (0.39)      | 0.20 (0.12)         | 0.30 (0.34)      | 0.25 (0.32)         |
| Road Dust          | 4.58 (2.7)       | 3.66 (2.1)          | 5.32 (5.9)       | 4.67 (6.0)          |
| Wood Combustion    | 20.47 (12.1)     | 31.64 (18.6)        | 26.71 (29.7)     | 21.27 (27.1)        |
| Marine Salt        | 1.02 (0.61)      | 1.43 (0.84)         | 3.52 (3.9)       | 3.14 (4.0)          |
| Secondary Sulfate  | 61.93 (36.7)     | 68.53 (40.3)        | 24.22 (26.9)     | 18.48 (23.6)        |
| Unidentified/Other | 56.08 (33.3)     | 40.27 (23.7)        | 15.72 (17.5)     | 17.31 (22.1)        |
