# Supplementary material for: Cardiac effects of seasonal ambient particulate matter and ozone co-exposure in rats
Source: PubMed Central journal article supplement (PMC4419498; doi:10.1186/s12989-015-0087-3), 2015-05-06
Supplement: 12989_2015_87_MOESM2_ESM.pdf [file 12989_2015_87_MOESM2_ESM.pdf]

Figure A1: Average source contributions for summer and winter exposures

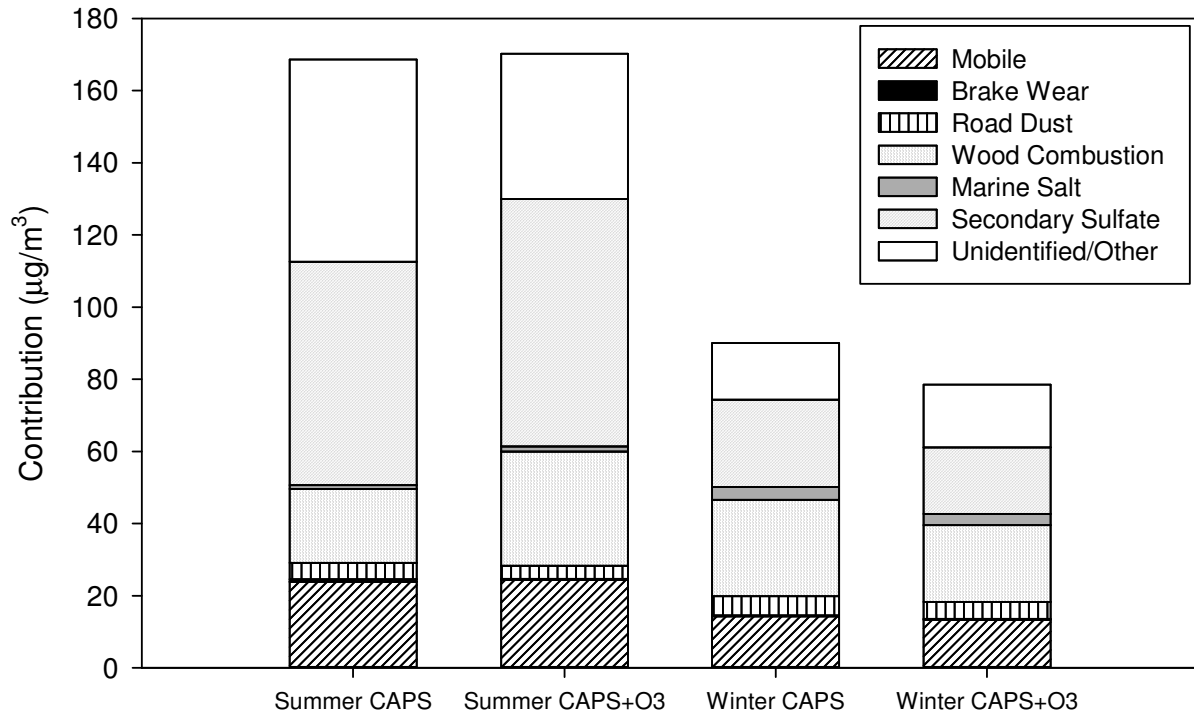

Figure A1: Stacked vertical bar representation of sources contributing to the CAPS and CAPS+O<sub>3</sub> mixtures during the summer and winter exposures.
