# Supplementary material for: Cardiac effects of seasonal ambient particulate matter and ozone co-exposure in rats
Source: PubMed Central journal article supplement (PMC4419498; doi:10.1186/s12989-015-0087-3), 2015-05-06
Supplement: 12989_2015_87_MOESM3_ESM.pdf [file 12989_2015_87_MOESM3_ESM.pdf]

Farraj et al Additional File 3:

Table A2: Source contributions for summer exposures by exposure day in  $\mu\text{g}/\text{m}^3$  (standard deviation in parenthesis).

| Source            | Summer Exposures  |                   |                                  |
|-------------------|-------------------|-------------------|----------------------------------|
|                   | CAPS<br>8/17/2011 | CAPS<br>8/18/2011 | CAPS+O <sub>3</sub><br>8/18/2011 |
| Mobile Sources    | 35.51 (6.95)      | 12.27 (2.46)      | 24.47 (4.81)                     |
| Brake Wear        | 1.15 (0.17)       | 0.16 (0.03)       | 0.20 (0.03)                      |
| Road Dust         | 5.37 (1.93)       | 3.79 (0.73)       | 3.66 (1.33)                      |
| Wood Combustion   | 13.74 (3.86)      | 27.21 (3.01)      | 31.64 (4.03)                     |
| Marine Salt       | 0.88 (0.10)       | 1.16 (0.14)       | 1.43 (0.18)                      |
| Secondary Sulfate | 67.23 (9.81)      | 56.63 (8.11)      | 68.53 (9.89)                     |
