# Supplementary material for: Cardiac effects of seasonal ambient particulate matter and ozone co-exposure in rats
Source: PubMed Central journal article supplement (PMC4419498; doi:10.1186/s12989-015-0087-3), 2015-05-06
Supplement: 12989_2015_87_MOESM4_ESM.pdf [file 12989_2015_87_MOESM4_ESM.pdf]

Farraj et al Additional File 4:

Table A3: Source contributions for winter exposures by exposure day in  $\mu\text{g}/\text{m}^3$  (standard deviation in parenthesis).

| Source            | Winter Exposures  |                   |                  |                                  |                                  |                                 |
|-------------------|-------------------|-------------------|------------------|----------------------------------|----------------------------------|---------------------------------|
|                   | CAPS<br>2/28/2012 | CAPS<br>2/29/2012 | CAPS<br>3/7/2012 | CAPS+O <sub>3</sub><br>2/28/2012 | CAPS+O <sub>3</sub><br>2/29/2012 | CAPS+O <sub>3</sub><br>3/7/2012 |
| Mobile Sources    | 19.54 (3.86)      | 8.64 (1.75)       | 14.65 (3.07)     | 18.52 (3.64)                     | 7.42 (1.51)                      | 14.14 (2.93)                    |
| Brake Wear        | 0.36 (0.06)       | 0.15 (0.02)       | 0.40 (0.07)      | 0.33 (0.05)                      | 0.13 (0.02)                      | 0.29 (0.05)                     |
| Road Dust         | 4.42 (1.09)       | 1.80 (0.48)       | 9.74 (1.18)      | 3.26 (1.01)                      | 1.77 (0.42)                      | 8.98 (1.08)                     |
| Wood Combustion   | 19.13 (2.88)      | 27.31 (2.88)      | 33.68 (4.36)     | 16.90 (2.59)                     | 21.75 (2.36)                     | 25.16 (3.47)                    |
| Marine Salt       | 1.23 (0.14)       | 4.45 (0.53)       | 4.87 (0.57)      | 1.05 (0.12)                      | 4.08 (0.48)                      | 4.28 (0.51)                     |
| Secondary Sulfate | 20.38 (3.09)      | 23.21 (3.40)      | 29.08 (4.30)     | 14.03 (2.20)                     | 16.71 (2.48)                     | 24.71 (3.67)                    |
