# Supplementary material for: Cardiac effects of seasonal ambient particulate matter and ozone co-exposure in rats
Source: PubMed Central journal article supplement (PMC4419498; doi:10.1186/s12989-015-0087-3), 2015-05-06
Supplement: 12989_2015_87_MOESM5_ESM.pdf [file 12989_2015_87_MOESM5_ESM.pdf]

Farraj et al Additional File 5:

Table A4: Heart Rate Variability data before and after exposure

|                     | Summer Exposures |       |       |       |                |                    |                     |                    | Winter Exposures |       |       |       |                |       |                     |       |
|---------------------|------------------|-------|-------|-------|----------------|--------------------|---------------------|--------------------|------------------|-------|-------|-------|----------------|-------|---------------------|-------|
|                     | Air              |       | CAPs  |       | O <sub>3</sub> |                    | CAPs+O <sub>3</sub> |                    | Air              |       | CAPs  |       | O <sub>3</sub> |       | CAPs+O <sub>3</sub> |       |
|                     | Pre              | Post  | Pre   | Post  | Pre            | Post               | Pre                 | Post               | Pre              | Post  | Pre   | Post  | Pre            | Post  | Pre                 | Post  |
| <b>RMSSD (msec)</b> | 3.5±0            | 3.6±0 | 5.5±0 | 5.1±0 | 3.3±0          | 3.7±0              | 4.5±0               | 3.6±0 <sup>a</sup> | 3.4±0            | 3.5±0 | 3.4±0 | 3.4±0 | 3.9±0          | 3.6±0 | 4.1±0               | 4.2±0 |
| <b>LF/HF(msec)</b>  | 1.1±0            | 1.0±0 | 0.9±0 | 1.0±0 | 0.7±0          | 1.2±0 <sup>b</sup> | 0.7±0               | 0.9±0 <sup>b</sup> | 1.3±0            | 0.9±0 | 0.8±0 | 1.0±0 | 0.9±0          | 1.4±0 | 0.9±0               | 1.4±0 |

Note: Data represent means during the immediate 6-hour period following exposure (Post) and the corresponding time-matched pre-exposure period (Pre).

a – Significant decrease from pre-exposure value; b – significant increase from pre-exposure value.
